# Supplementary material for: Early Risk Factors and Developmental Pathways to Chronic High Inhibition and Social Anxiety Disorder in Adolescence
Source: Atypon-hosted journal article supplement (doi:10.1176/appi.ajp.2009.07010051), 2009-11-17
Supplement: ajp_167_01_040_01.pdf [file ajp_167_01_040_01.pdf]

**TABLE S1. Spearman Correlations of Early Risk Factors With School-Age Inhibition Scores at Each Assessment (N=238)**

| School-Age Inhibition Scores <sup>a</sup>              |                    |         |                    |                    |         |
|--------------------------------------------------------|--------------------|---------|--------------------|--------------------|---------|
|                                                        | Grade 1            | Grade 3 | Grade 5            | Grade 7            | Grade 9 |
| Child gender<br>(0=boys; 1=girls)                      | 0.222**            | 0.278** | 0.212**            | 0.256**            | 0.134*  |
| Exposure to maternal stress,<br>birth to age 4.5 years | 0.121 <sup>†</sup> | 0.177** | 0.120 <sup>†</sup> | 0.175**            | 0.219** |
| Observed behavioral<br>inhibition, age 4.5 years       | 0.317**            | 0.300** | 0.153*             | 0.157*             | 0.161*  |
| Afternoon basal cortisol<br>levels, age 4.5 years      | 0.214**            | 0.253** | 0.213**            | 0.114 <sup>†</sup> | 0.069   |

<sup>a</sup> First principal components analysis component scores as described in Measures subsection of the Method section.

<sup>†</sup> p<0.10; \*p<0.05; \*\*p<0.01.
